# Supplementary material for: Chemical Analysis and Biological Activities of Extracts Isolated from Symbiotic L. japonicus Plants
Source: MDPI journal article supplement (doi:10.3390/life14020189), 2024-01-27
Supplement: s1 [file s1]

Supplementary Figure S1

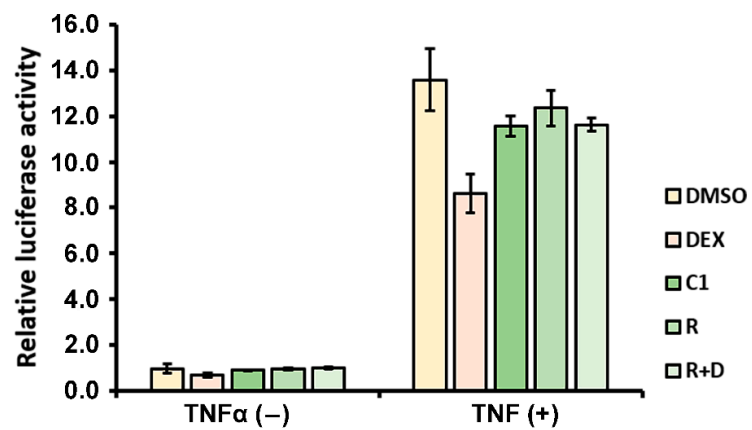

**Figure S1.** Anti-inflammatory activities of shoot extracts from *Rhizobium*-inoculated plants. Anti-inflammatory activities of extracts from non-inoculated plants grown at 21° C (C1), *Rhizobium*-inoculated (R), and *Rhizobium*-AMF double inoculated plants (R+D) were evaluated by assessment of the suppression of the TNF $\alpha$ -induced NF- $\kappa$ B transcriptional activation in HEK-293 cells. HEK-293 cells were co-transfected with the NF- $\kappa$ B-luciferase reporter and the  $\beta$ -galactosidase reporter constructs and subsequently were treated with 40  $\mu$ g/ml plant extracts, or with 1  $\mu$ M DEX, for 6 hours, in the presence or absence of 20 ng/ml TNF $\alpha$ , at hormone-free medium. Results were expressed as relative luciferase activity normalized against  $\beta$ -galactosidase activity. Relative luciferase activity in control TNF $\alpha$ -minus DMSO-treated cells was set at 1. No statistically significant differences were observed by the *Rhizobium*-associated extracts compared to the non-inoculated plant extracts and to the DMSO treatment.
