# Supplementary material for: Chemical Analysis and Biological Activities of Extracts Isolated from Symbiotic L. japonicus Plants
Source: Life (Basel). 2024 Jan 27;14(2):189. doi: 10.3390/life14020189 (PMC10889931; doi:10.3390/life14020189)
Supplement: Supplementary file 1 [file life-14-00189-s001.zip]

Archive with 4 entries (4 files):
- Supplementary data - Methodology.pdf
- Supplementary Figure S1.pdf
- Supplementary Table S1.xlsx
- Supplementary Table S2.xlsx
