# Supplementary material for: Chemical Analysis and Biological Activities of Extracts Isolated from Symbiotic L. japonicus Plants
Source: Life (Basel). 2024 Jan 27;14(2):189. doi: 10.3390/life14020189 (PMC10889931; doi:10.3390/life14020189)
Supplement: Supplementary file 1 [file life-14-00189-s001.zip › Supplementary Table S1.xlsx]

## Sheet: identified metabolites
List of metabolites identified in the extracts
METABOLITE	CATEGORY
vanillic acid	phenolic acid
3,4-Dihydroxyphenylacetic acid	phenolic acid
Apigenin 7-glucoside	phenolic compound
Cyanidin 3-rhamnosyl-glucosyl-glucoside	anthocyanins, flavonoids
Cyanidin 3-rutinoside	anthocyanins, polyphenol
Hydroxycaffeic acid	phenolic acid
Isoorientin	flavone
Isorhoifolin	flavonoid glycoside
Lariciresinol	lignan (phenolic)
Luteolin 5-glucoside	flavonoid
Peonidin 3-[4-hydroxycinnamoyl-b-D-glucopyranoside]	flavonoid lipid molecule
Quercetin 3-rutinoside (RUTIN or Vitamin P)	flavonol glycoside, polyphenolic
Secoisolariciresinol	lignan (phenolic)
gamma-Tocopherol (Vitamin E)	phenolic
m-Coumaric acid	phenylpropenoic acid (polyphenol)
(-)-Maackiain	isoflavonoid
(-)-glycinol	isoflavone
(-)-phaseollin	isoflavonoid (legumes)
(-)-vestitol	isoflavonoid (legumes)
(3R)-Sophorol	isoflavonone
(6aR,11aR)-3,9-Dihydroxypterocarpan	isoflavonoid
2'-Hydroxydihydrodaidzein	hydroxyisoflavonone
2'-Hydroxyformononetin (Xenognosin B)	4'-o-methylisoflavone
Astragalin	flavonoid
Chalconaringenin	flavonoid
Delphinidin	anthocyanidin (flavonoid)
Eugenol	phenylpropene (essential oil)
Formononetin	isoflavone
Genistein	isoflavone
Genistin	isoflavone
Homogentisic acid	phenolic acid
Hydroxybupropion	alcohol (phenolic)
Leucodelphinidin	leukoanthocyanidin (flavonoid)
Leucopelargonidin	leukoanthocyanidin (flavonoid)
Lotaustralin	cyanogenic glucoside (alkaloid)
Pelargonidin	anthocyanidin (flavonoid)
Phenylacetaldehyde	phenolic
Sinapaldehyde	phenol
Sinapyl alcohol	phenolic compound
Vestitone	isoflavone
coniferyl acetate	acetate ester (phenol)
pelargonidin 3-O-sophoroside	anthocyanidin (phenolic)
pelargonidin 3-O--D-caffeoylglucoside	anthocyanidin (phenolic)
apigenin glucoside	flavonoid
astragalin	flavonoid
caffeic acid hexoside	phenolic acid
coniferaldehyde	phenylpropanoid (lignin residue)
coumaric acid glucoside	phenolic compound
diosmetin	flavonoid
Eriodictyol	polyphenolic flavanone (flavonoid)
Helichrysoside	flavonoid glycoside
kaempferol rhamnosyl glucoside	flavonol glycoside
Caffeine	purine alkaloid
Cinchonidine	alkaloid
Theobromine	alkaloid
Portulacaxanthin II	nitrogen-containing pigment
Pantothenic acid (Vitamin B5)	N-containing compound
Xanthosine	purine base
Oleanolic acid	triterpenoid
Ursolic acid	triterpene acid
(-)-Menthone	triterpenoid
(-)-lactol	triterpenoid ?
Desmosterol	sterol
Vitamin D	seco-sterol
Phlorisovalerophenone	polyketide
Myristoleic acid	fatty acid
Octadecanoic acid	fatty acid
Oleic acid	fatty acid
Palmitoleic acid	fatty acid
Pentadecanoic acid	fatty acid
Tetracosanoic acid	fatty acid
Vaccenic acid	fatty acid
linoleate	ω-6 fatty acid
palmitate	fatty acid
Glycerol tributanoate	triacylglycerols (fatty acid + glycerol)
