# Supplementary material for: Chemical Analysis and Biological Activities of Extracts Isolated from Symbiotic L. japonicus Plants
Source: Life (Basel). 2024 Jan 27;14(2):189. doi: 10.3390/life14020189 (PMC10889931; doi:10.3390/life14020189)
Supplement: Supplementary file 1 [file life-14-00189-s001.zip › Supplementary Table S2.xlsx]

## Sheet: semiquantification
Semi-quantification of selected metabolites
	SHOOT EXTRACTS					ROOT EXTRACTS
METABOLITE	control	AMF	AMF-D	R	R+D	control	AMF	AMF-D	R	R+D
vanillic acid	1.765	0.647	1.925	2.05	1.589	18.43	9.305	3.971	55.8	26.99
dihydrophenylacetic acid	1.765	0.647	1.925	2.05	1.589	18.43	9.305	3.971	55.8	26.99
apigenin 7-glucoside	5.163	1.9	1.462	28.06	17.45	1.803	3.484	3.719	0.6852	3.645
cyanidin3-rytinoside	20.44	8.396	2.39	49.96	33.85	3.006	4.058	2.218	1.859	20.58
hydroxycaffeic acid	1.087	0.6074	1.164	3.746	1.844	0.3278	0	0.1303	3.502	2.435
isoorientin	11.67	6.727	5.254	37.36	9.36	6.126	5.283	4.845	7.152	5.496
isorhoifolin	833.4	281.6	221.3	4236	2397	5.58	2.701	1.067	25.62	17.03
lariciresinol	34.87	19.47	21.32	20.42	35.84	23.25	31.01	58.44	39.22	123.3
luteolin-5-glucoside	11.67	6.727	5.254	37.36	9.36	6.126	5.283	4.845	7.152	5.496
luteolin-7-glucoside	11.67	6.727	5.254	37.36	9.36	6.126	5.283	4.845	7.152	5.496
quercetin-3-rutinoside	38.68	7.985	12.16	182	49.91	0	0	0	0	0
gamma tocopherol	0.8703	0.01899	0.8366	6.246	0.9359	17.37	2.338	4.173	39.77	39.32
m-coumaric acid	94.22	58.45	26.32	167.5	97.82	0.1672	0.1467	0.1508	3.254	1.37
maachiain	35.03	2.927	11.08	13.9	15.13	35.11	5.407	5.758	18.63	395.5
glycinol	14.8	19.84	17.64	17.62	17.04	16.79	16.89	15.63	18.2	16.19
phaseollin	4.644	2.606		16.19	8.285	438.3	37.33	21.74	162.8	1237
vestitol	2349	42.75	874.9	325.2	401.7	9.066	1.15	1.18	151.9	40.67
sophorol	41.54	1.615	25.16	16.79	60.35	28.71	2.459	1.894	9.021	243.7
(6aR,11aR)-3,9-Dihydroxypterocarpan	6.987	1.663	2.015	4.55	1.728	7.442	7.445	1.389	49.39	17.66
(S)-dihydrodaidzein	6.987	1.663	2.015	4.55	1.728	7.442	7.445	1.389	49.39	17.66
2'-Hydroxyformononetin	35.03	2.927	11.08	13.9	15.13	35.11	5.407	5.758	18.63	395.5
astragalin	11.67	6.727	5.254	37.36	9.36	6.126	5.283	4.845	7.152	5.496
chalconaringenin	14.8	19.84	17.64	17.62	17.04	16.79	16.89	15.63	18.2	16.19
delphinidin	114.1	8.436	6.696	8.252	6.008	34.88	10.23	2.759	1.751	0.4809
eugenol	0.0267	1.627	1.928	2.158	2.113	1.308	1.328	1.563	2.856	2.112
formonetin	51.74	1.685	19.29	11.02	16.8	9.892	2.67	0.2695	27.34	15.69
genistein	36.78	6.492	2.57	2.75	2.788	11.48	4.077	2.328	6.472	4.159
genistin	8.291	5.452	4.547	0.05316	17.45	1.803	3.484	3.719	3.026	3.645
homogentistic acid	1.765	0.647	1.925	2.05	1.589	18.43	9.305	3.971	55.8	26.99
leucopelargonidin	1.337	6.891	6.191	5.887	5.713	6.347	6.205	6.718	6.384	6.285
lotaustralin	62.8	20.64	43.67	62.78	112.4	4.437	1.66	0.5118	35.64	41.94
pelargonidin	36.78	6.492	2.57	2.75	2.788	11.48	4.077	2.328	6.472	0.2751
phenylalcetaldehyde	32.42	20.78	20.72	202.1	43.15	0.5209	0.04153	0.02066	6.572	3.011
sinapaldehyde	5.867	4.602	5.19	2.382	4.778	4.868	4.78	4.964	4.865	2.896
vestitone	28.92	22.63	19.2	18.72	19.57	24.37	21.47	19.32	24.65	21.16
coniferyl acetate	13.41	16.45	15.18	15.46	15.41	15.29	14.84	15.93	16.33	16.5
astragalin	11.67	6.727	5.254	37.36	9.36	6.126	5.283	4.845	7.152	5.496
caffeic acid hexoside	1.087	0.6074	1.164	3.746	1.844	0.3278	0	0.1303	3.502	2.435
coniferaldehyde	52.53	28.85	21.94	164.2	83.92	0.5702	0.4965	0.06902	1.853	2.569
diosmetin	41.54	1.615	25.16	16.79	60.35	28.71	2.459	1.894	9.021	243.7
eriodictyol	0	0	0	3.674	0	0	0	0	19.72	0
caffeine	1.458	0.7111	0.6537	2.011	3.255	0.7699	0.2277	0.2112	1.639	2.718
cinchonidine	5.099	5.366	5.297	6.121	5.113	4.617	5.152	1.709	0.5417	4.959
theobromine	2.732	2.085	0.3897	0.5578	2.127	1.588	0.2616	0.4643	1.222	3.49
portucalaxanthin	0.3238	1.286	2.918	8.484	0.1485	0.1491	0.09282	0.3619	1.252	0.1747
oleanolic acid	1485	446.1	961.4	3523	1302	2837	272.2	0.009538	4995	2029
ursolic acid	1485	446.1	961.4	3523	1302	2837	272.2	28.19	4995	2029
menthone	2.312	0.8736	1.677	4.708	2.606	1.434	1.002	1.081	1.344	1.115
desmosterol	6.567	7.594	8.249	4.345	4.028	8.789	10.84	9.194	5.056	4.095
myristoleic	5	1.964	2.554	2.879	9.06	4.379	2.865	2.989	5.831	35.17
octadecanoic acid	875.9	503.6	657.5	642.7	598.4	761.6	815.1	636.9	613.5	1398
oleic acid	370.8	237.4	197.5	300.1	229.1	364.1	272.4	398.4	1041	738.2
palmitoleic acid	65.7	46.95	44.29	42.55	91.68	58.44	66.13	59.33	81.72	405
pentadecanoic acid	39.54	32.89	33.54	24.97	46.85	52.57	47.47	35.57	57.07	148
glycerol tributanoate	148.9	68.79	75.14	106.9	154.2	81.11	82.28	207.2	185.2	480.2
